# Supplementary material for: Standardized phytotherapic extracts rescue anomalous locomotion and electrophysiological responses of TDP-43 Drosophila melanogaster model of ALS
Source: PubMed Central journal article supplement (PMC6207707; doi:10.1038/s41598-018-34452-1), 2018-10-30
Supplement: 41598_2018_34452_MOESM7_ESM.pdf [file 41598_2018_34452_MOESM7_ESM.pdf]

## Supplementary information

### **Standardized phytotherapeutic extracts rescue anomalous locomotion and electrophysiological responses of TDP-43 *Drosophila melanogaster* model of ALS**

**Riccardo Maccioni<sup>1+</sup>, Maria Dolores Setzu<sup>1+</sup>, Giuseppe Talani<sup>2+</sup>, Paolo Solari<sup>1</sup>, Ameya Kasture<sup>3</sup>, Sonja Sucic<sup>3</sup>, Simona Porru<sup>4</sup>, Patrizia Muronì<sup>1</sup>, Enrico Sanna<sup>4</sup>, Sanjay Kasture<sup>5</sup>, Elio Acquas<sup>4</sup>, Anna Liscia<sup>1</sup>**

<sup>1</sup>University of Cagliari, Department of Biomedical Sciences, Monserrato, 09042, Italy

<sup>2</sup>National Research Council (CNR), Institute of Neuroscience, Monserrato, 09042, Italy

<sup>3</sup>Medical University of Vienna, Institute of Pharmacology, Center of Physiology and Pharmacology, Vienna, A-1090, Austria

<sup>4</sup>University of Cagliari, Department of Life and Environmental Sciences, Cagliari, 09126, Italy

<sup>5</sup>Pinnacle Biomedical Research Institute, Bhopal, 462003, India.

+these authors contributed equally to this work

\*liscia@unica.it

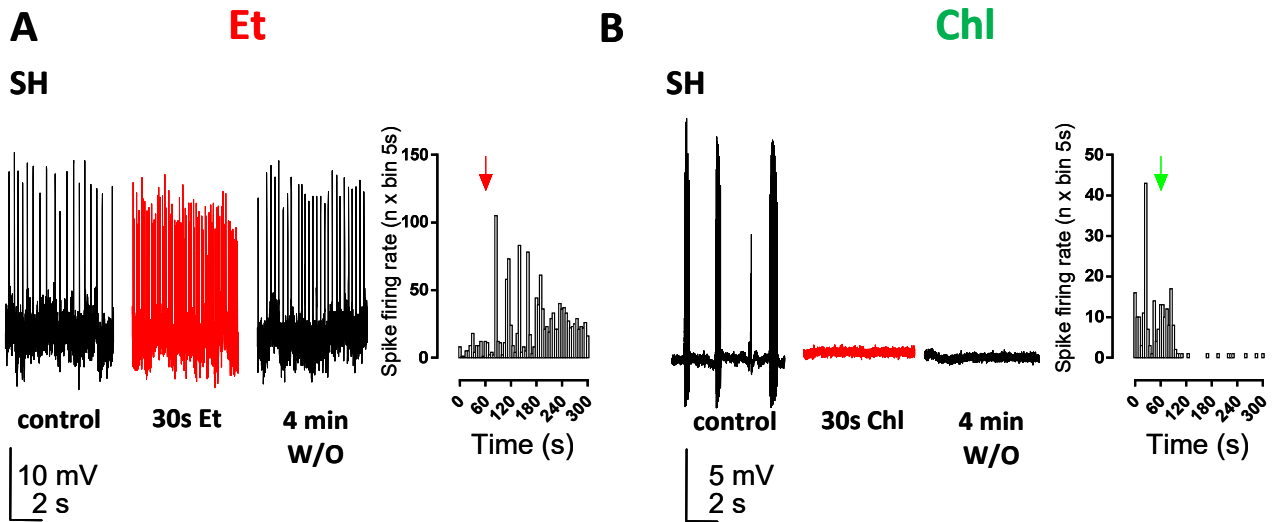

**Supplementary Figure S1:** Representative traces and plots obtained from SH mutant flies, in which spontaneous PSPs were recorded in the absence, after 30 s and after 4 min of ether (Et) or chloroform (Chl) exposure. Arrows in graphs indicate when vapours were delivered. Scale bars: left panels, 10 mV/2 s, right panels 5 mV/2 s.

### TLC PROFILE

|                                              |   |                                                  |
|----------------------------------------------|---|--------------------------------------------------|
| <b>Product Name</b>                          | : | <i>Mucuna pruriens</i> extract<br>(≥ 10% L-Dopa) |
| <b>Batch No.</b>                             | : | RD/3208                                          |
| <b>Reference extract used for comparison</b> |   | MP/140101                                        |

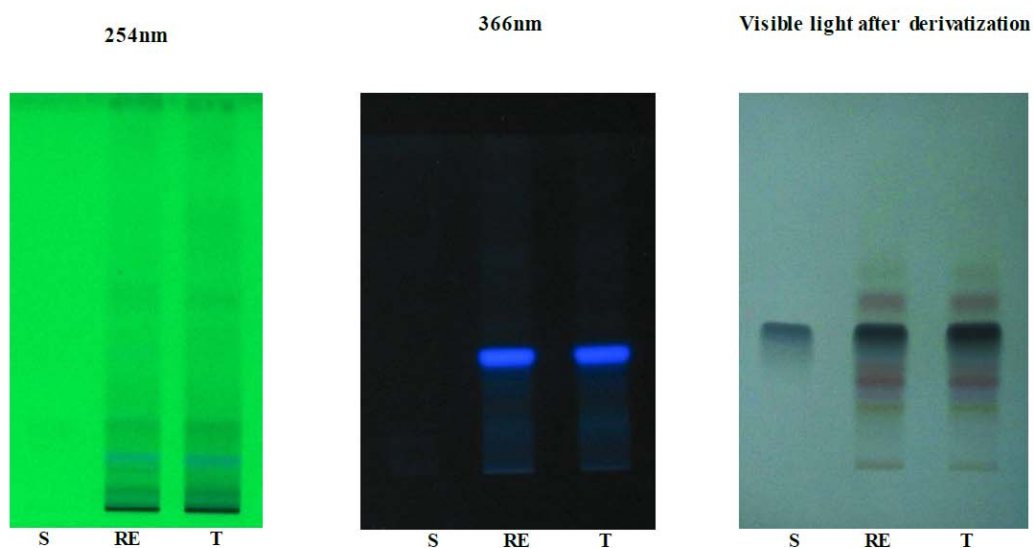

S : L-Dopa reference standard B. No. 59200  
 RE : *Mucuna pruriens* reference extract (prepared using crude drug reference standard (CDRS) B. No. 386) B. No. MP/140101  
 T : *Mucuna pruriens* extract B. No. RD/3208

| METHOD ADOPTED              |                                                                                                                 |
|-----------------------------|-----------------------------------------------------------------------------------------------------------------|
| <b>SOP No.</b>              | : NR/QCD/APM05 WI(31)                                                                                           |
| <b>Mobile Phase</b>         | : Butanol : Ethanol : Acetic acid : Water (60 : 32 : 12: 8)                                                     |
| <b>Detection</b>            | : Ninhydrine (30mg of ninhydrine in 10ml of Butanol & 0.3ml of Glacial acetic acid)                             |
| <b>Standard Preparation</b> | : 5 mg of L-Dopa dissolved in 5ml of 30%v/v aqueous Orthophosphoric acid solution diluted with methanol to 10ml |
| <b>Sample Preparation</b>   | : 500mg of extract + 10ml 30%v/v aqueous Orthophosphoric acid solution diluted to 100ml with methanol           |

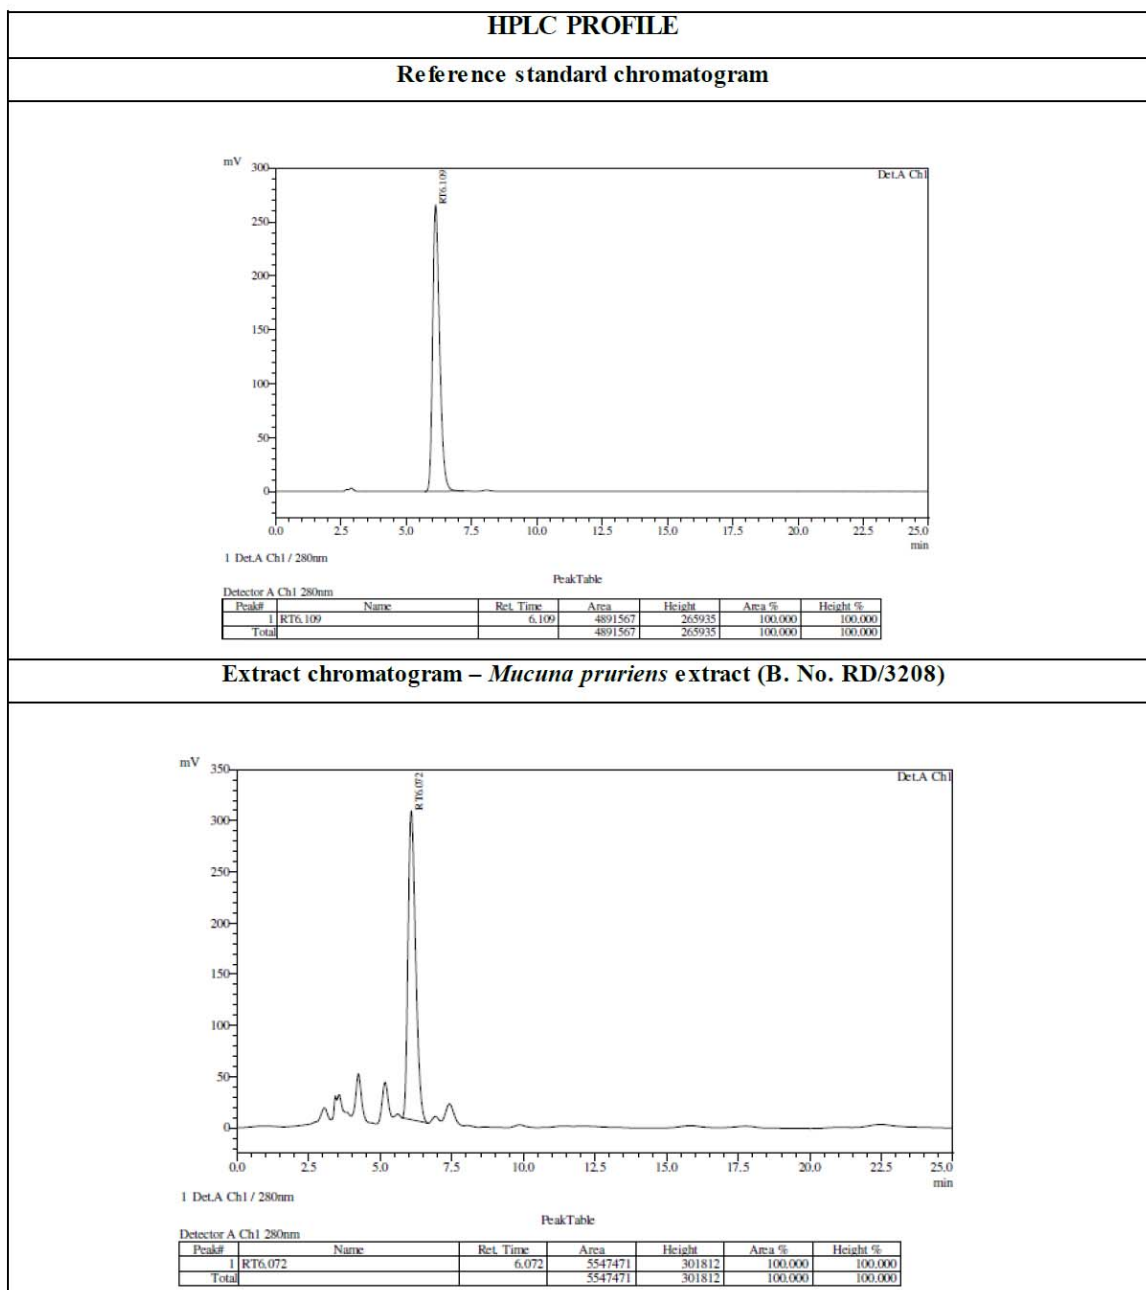

**Natural Remedies Private Limited**  
**Regd. Office & R&D**  
 CIN No: U24232KA1998PTC023573  
 5B, Veersandra Industrial Area, Hosur Road, Electronic City Phase 2, Bangalore 560100. Karnataka –INDIA  
 Tel: 91 8040209999/8/7,27382265, Fax: 91 80 40209817, Web: [www.naturalremedy.com](http://www.naturalremedy.com)  
 E-Mail: [qc@naturalremedy.com](mailto:qc@naturalremedy.com), [info@naturalremedy.com](mailto:info@naturalremedy.com)

| <b>METHOD ADOPTED</b>       |   |                                                                                                                                                                    |
|-----------------------------|---|--------------------------------------------------------------------------------------------------------------------------------------------------------------------|
| <b>SOP No.</b>              | : | NR/QCD/APM06 WI(31)                                                                                                                                                |
| <b>Mobile phase</b>         | : | Buffer : Acetonitrile<br>92 : 8<br>(Buffer: 1.36gm of potassium di hydrogen orthophosphate to 900ml of water and adjust the pH to 2.5 using orthophosphoric acid). |
| <b>Column</b>               | : | C18-ODS. 5 $\mu$ size, 250 x 4.6 mm (Merck).                                                                                                                       |
| <b>Flow Rate</b>            | : | 2.0 ml/ min                                                                                                                                                        |
| <b>Wave Length</b>          | : | 280 nm                                                                                                                                                             |
| <b>Standard Preparation</b> | : | 500mcg/ml L-Dopa is dissolved in 5ml 30% orthophosphoric acid.<br>Add water and make up to 100ml                                                                   |
| <b>Sample Preparation</b>   | : | 5000mcg/ml of extract is dissolved in 5 ml of 30% orthophosphoric acid. Add water and make up to 100ml.                                                            |

**Natural Remedies Private Limited**

**Regd. Office & R&D**

CIN No: U24232KA1998PTC023573

5B, Veersandra Industrial Area, Hosur Road, Electronic City Phase 2, Bangalore 560100. Karnataka – INDIA

Tel: 91 8040209999/8/7,27382265, Fax: 91 80 40209817, Web: [www.naturalremedy.com](http://www.naturalremedy.com)

E-Mail: [qc@naturalremedy.com](mailto:qc@naturalremedy.com), [info@naturalremedy.com](mailto:info@naturalremedy.com)

### TLC PROFILE

|                                              |   |                                   |
|----------------------------------------------|---|-----------------------------------|
| <b>Product Name</b>                          | : | <i>Withania somnifera</i> extract |
| <b>Batch No.</b>                             | : | PC/FWS1701003                     |
| <b>Reference extract used for comparison</b> | : | WS/170101                         |
| <b>Source of reference standard</b>          | : | Natural Remedies Pvt. Ltd.        |

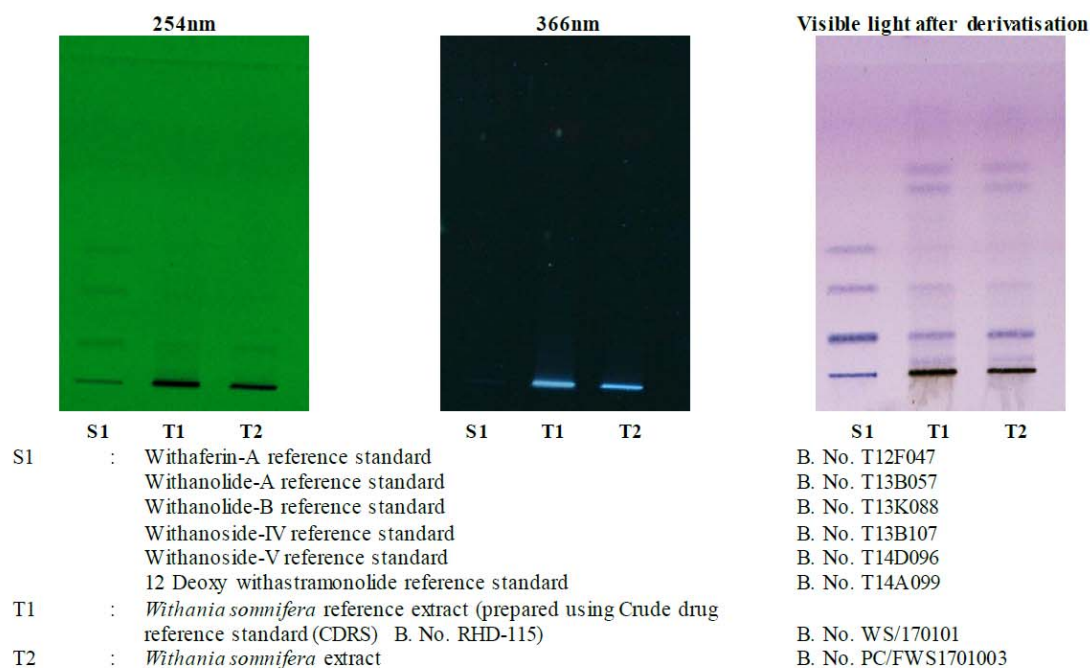

| METHOD ADOPTED                                 |                                                        |
|------------------------------------------------|--------------------------------------------------------|
| <b>SOP No.</b>                                 | : NR/QCD/APM05 WI(17)                                  |
| <b>Mobile Phase</b>                            | : Ethyl Acetate : Toluene : Acetic acid<br>45 : 55 : 3 |
| <b>Detection</b>                               | : Anisaldehyde Sulphuric acid                          |
| <b>Standard Preparation (All withanolides)</b> | : 0.5mg of each withanolides per ml in Methanol        |
| <b>Sample Preparation</b>                      | : 3g of extract in 50ml Methanol                       |

### HPLC PROFILE

**Chromatogram - Standard mix Withaferin-A (B. No. T12F047), Withanolide-A (B. No. T13B057), Withanolide-B (B. No. T13K088), Withanoside IV (B. No. T13B107), Withanoside V (B. No. T14D096), 12-Deoxywithastramonolide reference standard (B. No. T14A099)**

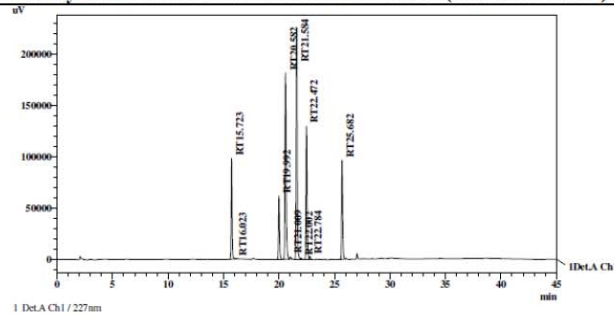

PeakTable @E:\2017\Glycyrrhiza\Jan 2017\17.01.2017\Data004.lcd

| Peak# | Name     | Ret. Time | Area    | Area %  |
|-------|----------|-----------|---------|---------|
| 1     | RT15.723 | 15.723    | 597483  | 11.162  |
| 2     | RT16.023 | 16.023    | 3585    | 0.067   |
| 3     | RT19.992 | 19.992    | 425917  | 7.914   |
| 4     | RT20.582 | 20.582    | 1324782 | 24.616  |
| 5     | RT21.009 | 21.009    | 17610   | 0.327   |
| 6     | RT21.584 | 21.584    | 1506534 | 27.988  |
| 7     | RT22.002 | 22.002    | 9026    | 0.168   |
| 8     | RT22.472 | 22.472    | 855200  | 15.890  |
| 9     | RT22.784 | 22.784    | 19897   | 0.370   |
| 10    | RT25.682 | 25.682    | 622501  | 11.547  |
| Total |          |           | 5381834 | 100.000 |

### Reference Extract chromatogram – *Withania somnifera* extract (B. No WS/170101)

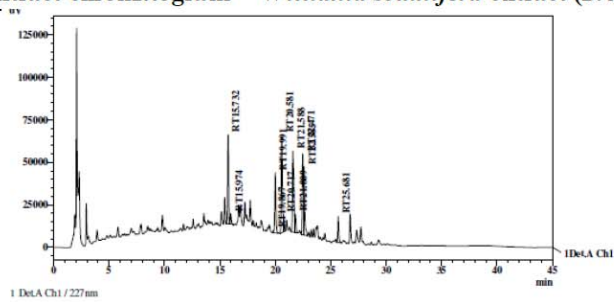

PeakTable @E:\2017\Glycyrrhiza\Jan 2017\17.01.2017\Data006.lcd

| Peak# | Name     | Ret. Time | Area    | Area %  |
|-------|----------|-----------|---------|---------|
| 1     | RT15.732 | 15.732    | 310879  | 13.994  |
| 2     | RT15.974 | 15.974    | 29238   | 1.265   |
| 3     | RT19.867 | 19.867    | 2125    | 0.231   |
| 4     | RT19.991 | 19.991    | 245942  | 11.071  |
| 5     | RT20.581 | 20.581    | 409097  | 18.411  |
| 6     | RT20.717 | 20.717    | 51603   | 2.323   |
| 7     | RT21.588 | 21.588    | 442010  | 19.896  |
| 8     | RT21.809 | 21.809    | 6554    | 0.281   |
| 9     | RT22.471 | 22.471    | 278184  | 12.513  |
| 10    | RT23.585 | 23.585    | 275250  | 12.490  |
| 11    | RT25.681 | 25.681    | 98850   | 4.450   |
| Total |          |           | 2221554 | 100.000 |

Natural Remedies Private Limited  
 Regd. Office & R&D  
 CIN No: U24232KA1998PTC023573  
 5B, Veersandra Industrial Area, Hosur Road, Electronic City Phase 2, Bangalore 560100. Karnataka – INDIA  
 Tel: 91 8040209999/8/7,27382265, Fax: 91 80 40209817, Web: [www.naturalremedy.com](http://www.naturalremedy.com)  
 E-Mail: [qc@naturalremedy.com](mailto:qc@naturalremedy.com), [info@naturalremedy.com](mailto:info@naturalremedy.com)

**Extract chromatogram – *Withania somnifera* extract (Batch No. PC/FWS1701003)**

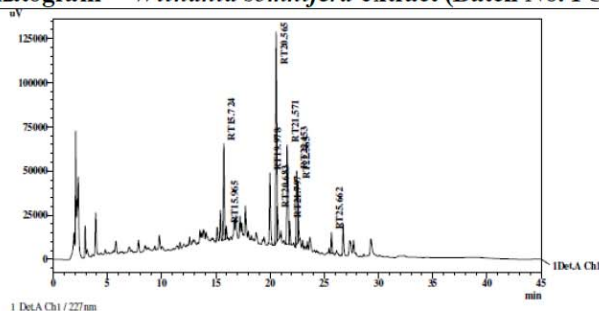

PeakTable: @E:\2017\Withania\Jan 2017\17.01.2017\Data007.Jed

| Peak# | Name     | Ret. Time | Area    | Area %  |
|-------|----------|-----------|---------|---------|
| 1     | RT15.724 | 15.724    | 321897  | 12.139  |
| 2     | RT15.965 | 15.965    | 41570   | 1.568   |
| 3     | RT19.976 | 19.976    | 282288  | 10.355  |
| 4     | RT20.565 | 20.565    | 818719  | 30.074  |
| 5     | RT20.683 | 20.683    | 73300   | 2.764   |
| 6     | RT21.571 | 21.571    | 509448  | 19.211  |
| 7     | RT21.797 | 21.797    | 86427   | 3.251   |
| 8     | RT22.453 | 22.453    | 255179  | 9.633   |
| 9     | RT22.565 | 22.565    | 189145  | 7.133   |
| 10    | RT25.662 | 25.662    | 71019   | 2.678   |
| Total |          |           | 2651810 | 100.000 |

**METHOD ADOPTED**

|                                                |   |                                                                                                                                |
|------------------------------------------------|---|--------------------------------------------------------------------------------------------------------------------------------|
| <b>SOP No.</b>                                 | : | NR/QCD/APM04 WI(17)                                                                                                            |
| <b>Mobile phase</b>                            | : | 1) Buffer: 0.01N potassium dihydrogen phosphate in water and 0.5ml orthophosphoric acid.<br>2) Acetonitrile (Gradient Elution) |
| <b>Column</b>                                  | : | LichroCART, Lichrospher, C18-5 $\mu$ (Merck)                                                                                   |
| <b>Flow Rate</b>                               | : | 1.500ml/min                                                                                                                    |
| <b>Wave Length</b>                             | : | 227nm                                                                                                                          |
| <b>Standard Preparation (All withanolides)</b> | : | 0.5mg of each withanolides per ml in Methanol                                                                                  |
| <b>Sample Preparation</b>                      | : | 40mg/ml of extract in Methanol                                                                                                 |

Natural Remedies Private Limited

Regd. Office & R&D

CIN No: U24232KA1998PTC023573

5B, Veersandra Industrial Area, Hosur Road, Electronic City Phase 2, Bangalore 560100. Karnataka – INDIA

Tel: 91 8040209999/8/7,27382265, Fax: 91 80 40209817, Web: [www.naturalremedy.com](http://www.naturalremedy.com)

E-Mail: [qc@naturalremedy.com](mailto:qc@naturalremedy.com), [info@naturalremedy.com](mailto:info@naturalremedy.com)



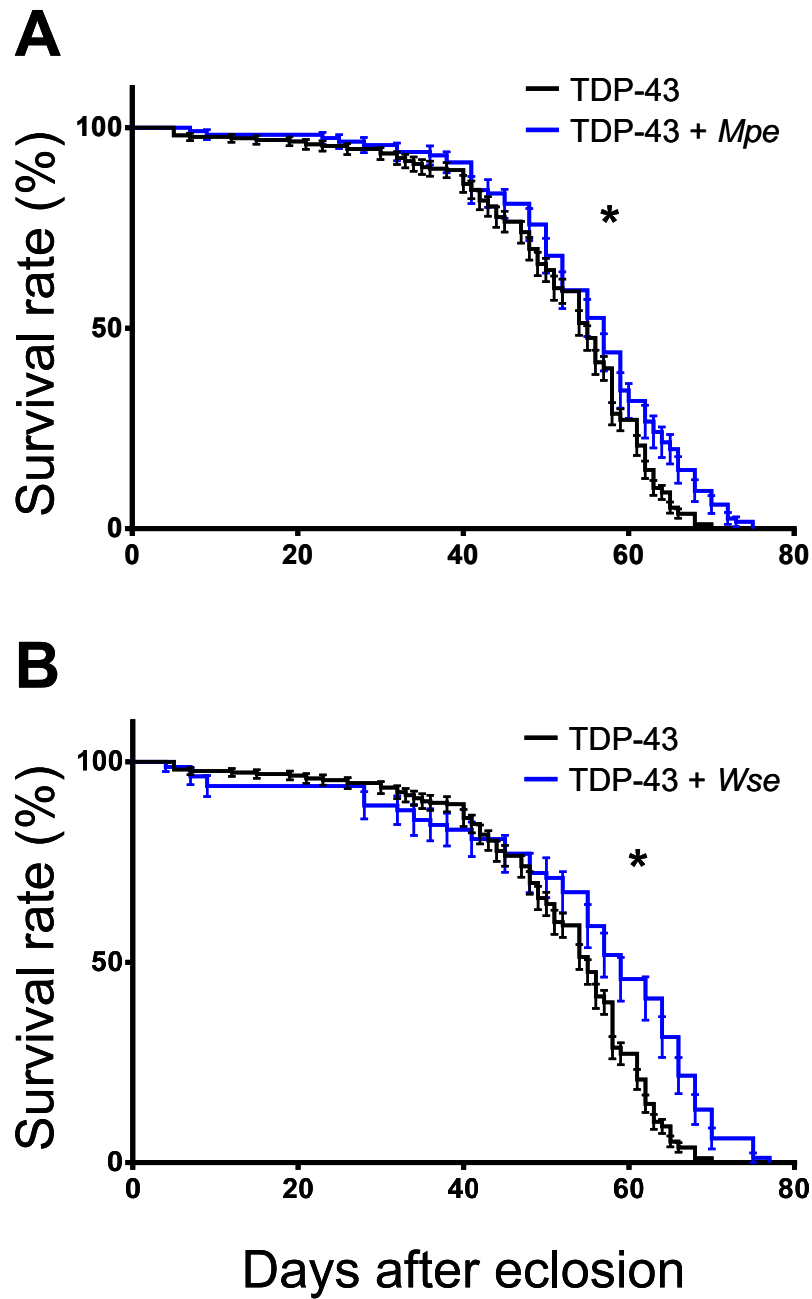

**Supplementary Figure S4:** Effects of *Mucuna pruriens* extract (*Mpe*) and *Withania somnifera* extract (*Wse*) treatment on lifespan of TDP-43 mutant. \* Indicates  $p < 0.05$  at Kaplan-Meier survival curves (Gehan-Breslow-Wilcoxon-Graph Pad Prism 5.01).

**Supplementary Video S1:** *Drosophila* TDP-43 mutants showing spastic paralysis coupled to shaker-like movements after ether supply.

**Supplementary Video S2:** *Drosophila* TDP-43 mutants showing spastic paralysis coupled to shaker-like movements after chloroform supply.

**Supplementary Video S3:** *Drosophila* GAL4 flies do not show any particular movement after ether supply.

**Supplementary Video S4:** *Drosophila* SH flies do not show any particular movement after chloroform supply.

**Supplementary Video S5:** *Drosophila* *Wse*-treated TDP-43: treatment prevents the effect of ether administration observed in untreated TDP-43 mutant flies.

**Supplementary Video S6:** *Drosophila* *Mpe*-treated TDP-43: treatment prevents the effect of ether administration observed in untreated TDP-43 mutant flies.
